# Supplementary material
Source: PubMed Central journal article supplement (PMC9115769)
Supplement: NIHMS1799904-supplement-1.pdf [file NIHMS1799904-supplement-1.pdf]

**Supplementary Fig. 1**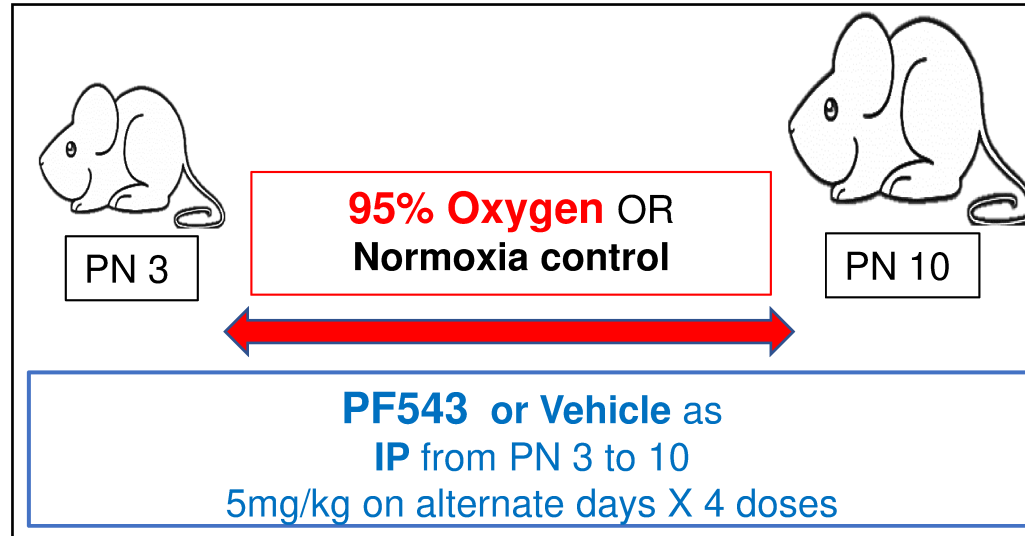

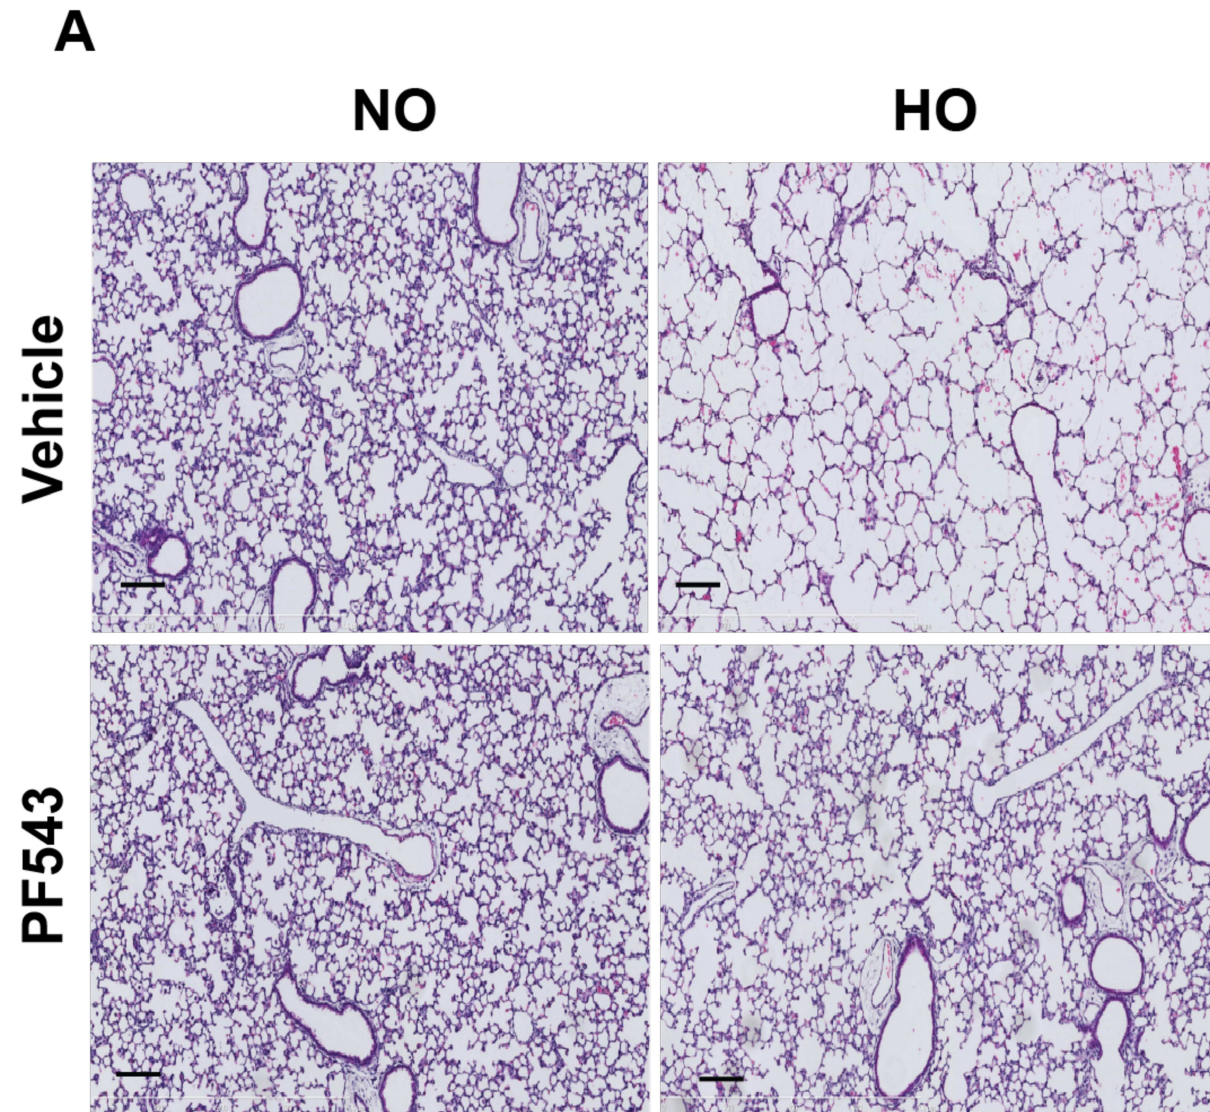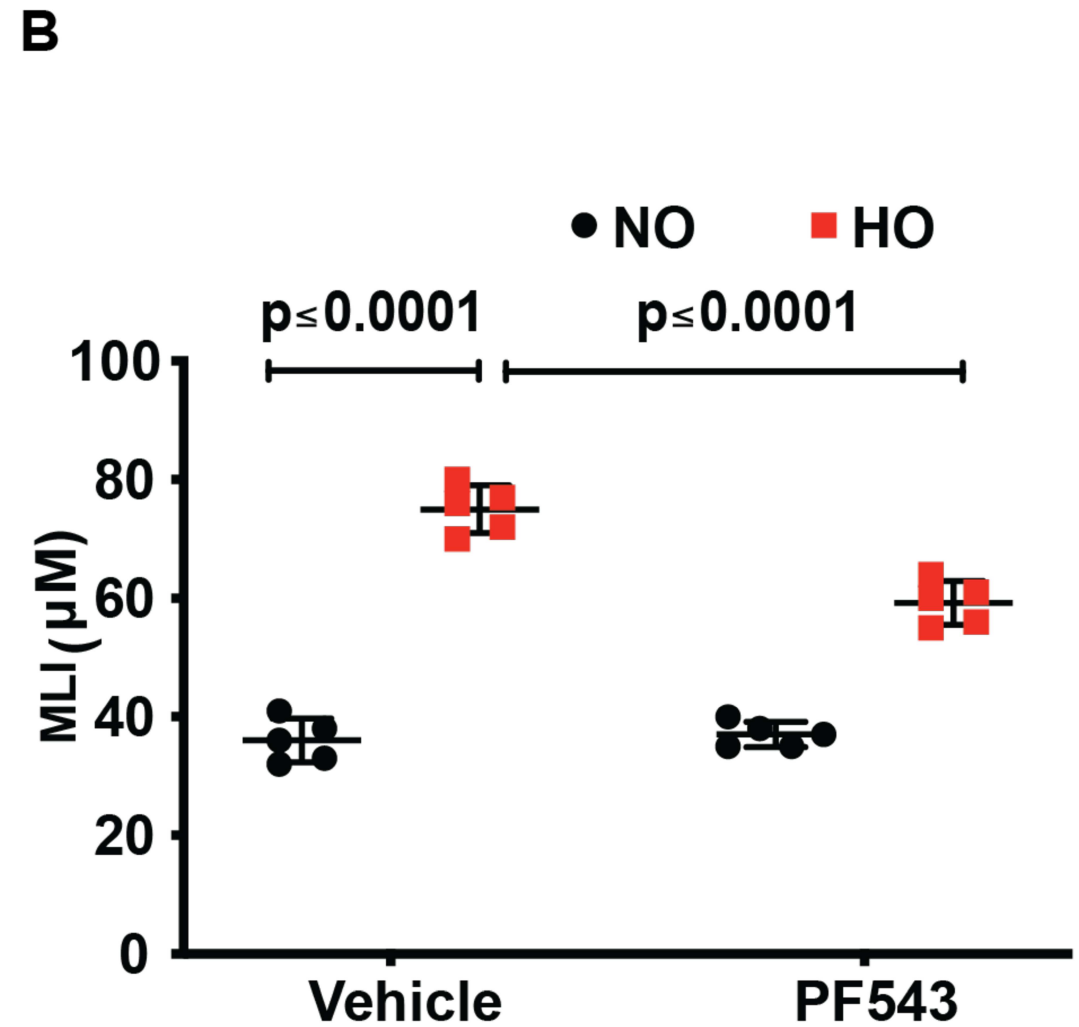

Table 1. MatInspector (Genomatix) Promoter Analyses for LOX

## Transcript 1. Inspecting sequence GXP\_123790(LOX/human) [GXP\_123790] (1-704):

| Family  | Detailed Family Information                      | Matrix      | Detailed Matrix Information                        | Position From | Position To | Anchor | Strand | Matrix Similarity |   | Additional Lines of Evidence                                                                                                                                                                                | Sequence            |
|---------|--------------------------------------------------|-------------|----------------------------------------------------|---------------|-------------|--------|--------|-------------------|---|-------------------------------------------------------------------------------------------------------------------------------------------------------------------------------------------------------------|---------------------|
| V\$STAT | Signal transducer and activator of transcription | V\$STAT.01  | Signal transducer and activator of transcription   | 100           | 118         | 109    | (-)    | 0.966             | 4 | LOX is cocited with V\$STAT (TF: STAT1, STAT3)<br><br>part of model match of NFKB_STAT_02, STAT_GREF_01<br><br>Overlaps with Constrained Element<br><br>Correlates with ChipSeq peak of V\$STAT (TF: STAT3) | gctttatgGGAAgcgccc  |
| V\$STAT | Signal transducer and activator of transcription | V\$STAT3.02 | Signal transducer and activator of transcription 3 | 643           | 661         | 652    | (+)    | 0.968             | 2 | LOX is cocited with V\$STAT (TF: STAT1, STAT3)<br><br>Part of model match of NBRE_STAT_01                                                                                                                   | tgccTTCcaggactgagaa |

## Transcript 2. Inspecting sequence GXP\_1500117(LOX/human) [GXP\_1500117] (1-615):

| Family  | Detailed Family Information                      | Matrix      | Detailed Matrix Information                         | Position From | Position To | Anchor | Strand | Matrix Similarity |   | Additional Lines of Evidence                                                            | Sequence           |
|---------|--------------------------------------------------|-------------|-----------------------------------------------------|---------------|-------------|--------|--------|-------------------|---|-----------------------------------------------------------------------------------------|--------------------|
| V\$STAT | Signal transducer and activator of transcription | V\$STAT5A.0 | Signal transducer and activator of transcription 5A | 269           | 287         | 278    | (-)    | 0.871             | 2 | LOX is cocited with V\$STAT (TF: STAT1, STAT3)<br><br>Overlaps with constrained element | ctgtTTCcagcagtaaac |

## Transcript 3. Inspecting sequence GXP\_1500118(LOX/human) [GXP\_1500118] (1-713):

| Family  | Detailed Family Information                      | Matrix      | Detailed Matrix Information                        | Position From | Position To | Anchor | Strand | Matrix Similarity |   | Additional Lines of Evidence                   | Sequence           |
|---------|--------------------------------------------------|-------------|----------------------------------------------------|---------------|-------------|--------|--------|-------------------|---|------------------------------------------------|--------------------|
| V\$STAT | Signal transducer and activator of transcription | V\$STAT3.02 | Signal transducer and activator of transcription 3 | 499           | 517         | 508    | (-)    | 0.950             | 1 | LOX is cocited with V\$STAT (TF: STAT1, STAT3) | tggaTTCcagggtgccac |

**Supplementary Table 1. Patient data of lung samples used for Immunohistochemistry**

|                | Sex | Race  | Birth Weight (grams) | GA at birth (weeks) | Corrected GA at death | Length of NICU stay (days) |
|----------------|-----|-------|----------------------|---------------------|-----------------------|----------------------------|
| <b>BPD</b>     |     |       |                      |                     |                       |                            |
| 1              | F   | White | 540                  | 24.7                | 31.8                  | 50                         |
| 2              | F   | White | 575                  | 29.1                | 46.5                  | 122                        |
| 3              | F   | White | 520                  | 29.2                | 43.1                  | 87                         |
| 4              | M   | White | 965                  | 28                  | 45                    | 119                        |
| 5              | M   | White | 490                  | 25.4                | 34                    | 60                         |
| 6              | F   | AA    | 860                  | 27.2                | 32.1                  | 41                         |
| 7              | M   | AA    | 770                  | 26.5                | 34.2                  | 53                         |
| 8              | M   | H     | 920                  | 28                  | 36.1                  | 57                         |
| <b>Control</b> |     |       |                      |                     |                       |                            |
| 1              | M   | White | 1705                 | 32.3                | 32.7                  | 3                          |
| 2              | F   | White | 2835                 | 40                  | 40.6                  | 4                          |
| 3              | F   | White | 2580                 | 36                  | 36.1                  | 1                          |
| 4              | M   | AA    | 3120                 | 38.2                | 38.6                  | 4                          |
| 5              | M   | AA    | 2975                 | 41.1                | 42                    | 6                          |

Supplementary Table 2. LOX Western Blot Patient Data

|                | Sex | Race | Birthweight (grams) | GA at birth | Collected GA at Tracheal Collection | Length of NICU stay (days) |
|----------------|-----|------|---------------------|-------------|-------------------------------------|----------------------------|
| <b>BPD</b>     |     |      |                     |             |                                     |                            |
| 1              | F   | AA   | 550                 | 24.2        | 39.2                                | 105                        |
| 2              | F   | AA   | 720                 | 24.5        | 38.1                                | 94                         |
| 3              | M   | AA   | 960                 | 28.2        | 39.5                                | 75                         |
| <b>Control</b> |     |      |                     |             |                                     |                            |
| 1              | M   | AA   | 2370                | 39.3        | 39.3                                | 1                          |
| 2              | M   | H    | 2570                | 37          | 37.1                                | 2                          |
| 3              | F   | H    | 3100                | 38          | 38                                  | 1                          |

## Supplementary Table 3. MatInspector (Genomatix) Promoter Analyses for LOX

## Transcript 1. Inspecting sequence GXP\_123790(LOX/human) [GXP\_123790] (1-704):

| Family  | Detailed Family Information                      | Matrix      | Detailed Matrix Information                        | Position From | Position To | Anchor | Strand | Matrix Similarity |   | Additional Lines of Evidence                                                                                                                                                                                | Sequence            |
|---------|--------------------------------------------------|-------------|----------------------------------------------------|---------------|-------------|--------|--------|-------------------|---|-------------------------------------------------------------------------------------------------------------------------------------------------------------------------------------------------------------|---------------------|
| V\$STAT | Signal transducer and activator of transcription | V\$STAT.01  | Signal transducer and activator of transcription   | 100           | 118         | 109    | (-)    | 0.966             | 4 | LOX is cocited with V\$STAT (TF: STAT1, STAT3)<br><br>part of model match of NFKB_STAT_02, STAT_GREF_01<br><br>Overlaps with Constrained Element<br><br>Correlates with ChipSeq peak of V\$STAT (TF: STAT3) | gctttatgGGAAgcgccc  |
| V\$STAT | Signal transducer and activator of transcription | V\$STAT3.02 | Signal transducer and activator of transcription 3 | 643           | 661         | 652    | (+)    | 0.968             | 2 | LOX is cocited with V\$STAT (TF: STAT1, STAT3)<br><br>Part of model match of NBRE_STAT_01                                                                                                                   | tgccTTCCaggactgagaa |

## Transcript 2. Inspecting sequence GXP\_1500117(LOX/human) [GXP\_1500117] (1-615):

| Family  | Detailed Family Information                      | Matrix      | Detailed Matrix Information                         | Position From | Position To | Anchor | Strand | Matrix Similarity |   | Additional Lines of Evidence                                                            | Sequence            |
|---------|--------------------------------------------------|-------------|-----------------------------------------------------|---------------|-------------|--------|--------|-------------------|---|-----------------------------------------------------------------------------------------|---------------------|
| V\$STAT | Signal transducer and activator of transcription | V\$STAT5A.0 | Signal transducer and activator of transcription 5A | 269           | 287         | 278    | (-)    | 0.871             | 2 | LOX is cocited with V\$STAT (TF: STAT1, STAT3)<br><br>Overlaps with constrained element | ctgtTTCCcaggagtaaac |

## Transcript 3. Inspecting sequence GXP\_1500118(LOX/human) [GXP\_1500118] (1-713):

| Family  | Detailed Family Information                      | Matrix      | Detailed Matrix Information                        | Position From | Position To | Anchor | Strand | Matrix Similarity |   | Additional Lines of Evidence                   | Sequence            |
|---------|--------------------------------------------------|-------------|----------------------------------------------------|---------------|-------------|--------|--------|-------------------|---|------------------------------------------------|---------------------|
| V\$STAT | Signal transducer and activator of transcription | V\$STAT3.02 | Signal transducer and activator of transcription 3 | 499           | 517         | 508    | (-)    | 0.950             | 1 | LOX is cocited with V\$STAT (TF: STAT1, STAT3) | tggaTTCCagggctgccac |
